# Supplementary material for: Comparison of the effects of three sourdough postbiotics on high-fat diet-induced intestinal damage
Source: Royal Society of Chemistry journal article supplement (doi:10.1039/d4fo02948h), 2024-01-01
Supplement: d4fo02948h1.pdf [file d4fo02948h1.pdf]

Figure S1

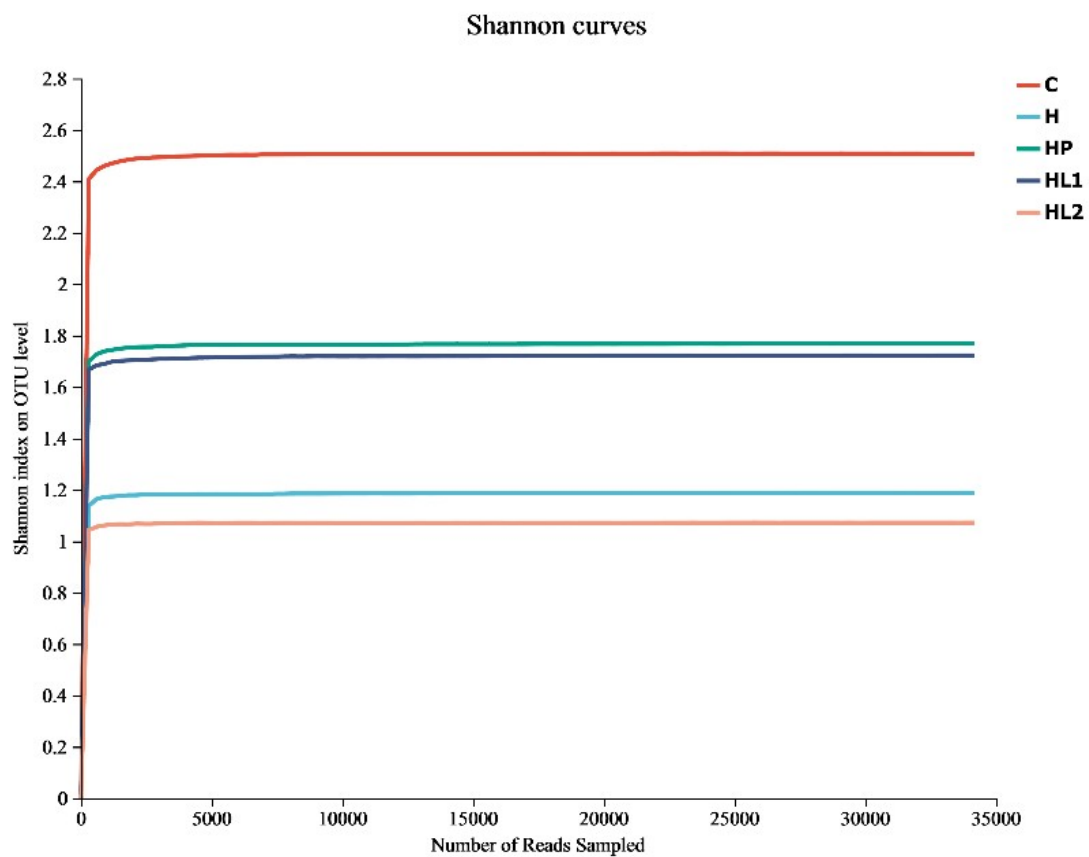

Figure S1. Shannon curves

**Table S1. Strain Basic Information**

| NO. | Strains  | Latin scientific name                | Strain source      |
|-----|----------|--------------------------------------|--------------------|
| 1   | B.s2     | <i>Bacillus subtilis</i>             | Laboratory storage |
| 2   | B.t1     | <i>Bacillus tequilensis</i>          | Laboratory storage |
| 3   | B.v1     | <i>Bacillus velezensis</i>           | Laboratory storage |
| 4   | E.f1     | <i>Enterococcus faecium</i>          | Laboratory storage |
| 5   | GM4      | <i>Lactiplantibacillus plantarum</i> | Laboratory storage |
| 6   | L.c1     | <i>Lactilactobacillus curvatus</i>   | Laboratory storage |
| 7   | L.c3     | <i>Lactilactobacillus curvatus</i>   | Laboratory storage |
| 8   | Leu.cit2 | <i>Leuconostoc citreum</i>           | Laboratory storage |
| 9   | L.m2     | <i>Leuconostoc mesenteroides</i>     | Laboratory storage |
| 10  | LP6      | <i>Lacticaseibacillus paracasei</i>  | Laboratory storage |
| 11  | L.p8     | <i>Lactiplantibacillus plantarum</i> | Laboratory storage |
| 12  | L.p10    | <i>Lactiplantibacillus plantarum</i> | Laboratory storage |
| 13  | L.p11    | <i>Lactiplantibacillus plantarum</i> | Laboratory storage |
| 14  | L.p12    | <i>Lactiplantibacillus plantarum</i> | Laboratory storage |
| 15  | L.p14    | <i>Lactiplantibacillus plantarum</i> | Laboratory storage |
| 16  | L.p17    | <i>Lactiplantibacillus plantarum</i> | Laboratory storage |
| 17  | L.p19    | <i>Lactiplantibacillus plantarum</i> | Laboratory storage |
| 18  | L.p20    | <i>Lactiplantibacillus plantarum</i> | Laboratory storage |
| 19  | LP21     | <i>Lacticaseibacillus paracasei</i>  | Laboratory storage |
| 20  | L.sakei2 | <i>Latilactobacillus sakei</i>       | Laboratory storage |
| 21  | P.a2     | <i>Pediococcus acidilactici</i>      | Laboratory storage |
| 22  | P.a3     | <i>Pediococcus acidilactici</i>      | Laboratory storage |
| 23  | P.p1     | <i>Pediococcus pentosaceus</i>       | Laboratory storage |
| 24  | P.p2     | <i>Pediococcus pentosaceus</i>       | Laboratory storage |
| 25  | P.p3     | <i>Pediococcus pentosaceus</i>       | Laboratory storage |
| 26  | P.p4     | <i>Pediococcus pentosaceus</i>       | Laboratory storage |
| 27  | P.p5     | <i>Pediococcus pentosaceus</i>       | Laboratory storage |
| 28  | P.p6     | <i>Pediococcus pentosaceus</i>       | Laboratory storage |
| 29  | P.p7     | <i>Pediococcus pentosaceus</i>       | Laboratory storage |
| 30  | B.a1     | <i>Bacillus amyloliquefaciens</i>    | Laboratory storage |
| 31  | B.a2     | <i>Bacillus amyloliquefaciens</i>    | Laboratory storage |
| 32  | L.b1     | <i>Levilactobacillus brevis</i>      | Laboratory storage |
| 33  | Leu.cit6 | <i>Leuconostoc citreum</i>           | Laboratory storage |
| 34  | L.f1     | <i>Leuconostoc fallax</i>            | Laboratory storage |
| 35  | L.m4     | <i>Leuconostoc mesenteroides</i>     | Laboratory storage |
| 36  | L.m5     | <i>Leuconostoc mesenteroides</i>     | Laboratory storage |

---

|    |          |                                             |                    |
|----|----------|---------------------------------------------|--------------------|
| 37 | LP4      | <i>Lacticaseibacillus paracasei</i>         | Laboratory storage |
| 38 | L.p4     | <i>Lactiplantibacillus plantarum</i>        | Laboratory storage |
| 39 | L.p15    | <i>Lactiplantibacillus plantarum</i>        | Laboratory storage |
| 40 | L.p16    | <i>Lactiplantibacillus plantarum</i>        | Laboratory storage |
| 41 | L.p23    | <i>Lactiplantibacillus plantarum</i>        | Laboratory storage |
| 42 | P.a1     | <i>Pediococcus acidilactici</i>             | Laboratory storage |
| 43 | P.ary2   | <i>Priestia aryabhatai</i>                  | Laboratory storage |
| 44 | P.p5     | <i>Pediococcus pentosaceus</i>              | Laboratory storage |
| 45 | P.p11    | <i>Pediococcus pentosaceus</i>              | Laboratory storage |
| 46 | P.p15    | <i>Pediococcus pentosaceus</i>              | Laboratory storage |
| 47 | P.p16    | <i>Pediococcus pentosaceus</i>              | Laboratory storage |
| 48 | R.k1     | <i>Rothia kristinae</i>                     | Laboratory storage |
| 49 | S.h1     | <i>Staphylococcus hominis</i>               | Laboratory storage |
| 50 | S.h2     | <i>Staphylococcus hominis</i>               | Laboratory storage |
| 51 | S.sap2   | <i>Staphylococcus saprophyticus</i>         | Laboratory storage |
| 52 | S.sap3   | <i>Staphylococcus saprophyticus</i>         | Laboratory storage |
| 53 | W.cib1   | <i>Weissella cibaria</i>                    | Laboratory storage |
| 54 | W.cib2   | <i>Weissella cibaria</i>                    | Laboratory storage |
| 55 | W.con1   | <i>Weissella confusa</i>                    | Laboratory storage |
| 56 | W.con2   | <i>Weissella confusa</i>                    | Laboratory storage |
| 57 | W.con3   | <i>Weissella confusa</i>                    | Laboratory storage |
| 58 | PP18     | <i>Pediococcus pentosaceus</i>              | Laboratory storage |
| 59 | FS5      | <i>Fructilactobacillus sanfranciscensis</i> | Laboratory storage |
| 60 | FS8      | <i>Fructilactobacillus sanfranciscensis</i> | Laboratory storage |
| 61 | FS9      | <i>Fructilactobacillus sanfranciscensis</i> | Laboratory storage |
| 62 | FS10     | <i>Fructilactobacillus sanfranciscensis</i> | Laboratory storage |
| 63 | FS16     | <i>Fructilactobacillus sanfranciscensis</i> | Laboratory storage |
| 64 | FS17     | <i>Fructilactobacillus sanfranciscensis</i> | Laboratory storage |
| 65 | FS20     | <i>Fructilactobacillus sanfranciscensis</i> | Laboratory storage |
| 66 | FS22     | <i>Fructilactobacillus sanfranciscensis</i> | Laboratory storage |
| 67 | FS25     | <i>Fructilactobacillus sanfranciscensis</i> | Laboratory storage |
| 68 | FS28     | <i>Fructilactobacillus sanfranciscensis</i> | Laboratory storage |
| 69 | Leu.cit1 | <i>Leuconostoc citreum</i>                  | Laboratory storage |
| 70 | Leu.cit4 | <i>Leuconostoc citreum</i>                  | Laboratory storage |
| 71 | L.m1     | <i>Leuconostoc mesenteroides</i>            | Laboratory storage |
| 72 | L.m3     | <i>Leuconostoc mesenteroides</i>            | Laboratory storage |
| 73 | L.m5     | <i>Leuconostoc mesenteroides</i>            | Laboratory storage |
| 74 | LP1      | <i>Lactiplantibacillus plantarum</i>        | Laboratory storage |

---

|    |      |                                             |                    |
|----|------|---------------------------------------------|--------------------|
| 75 | FS2  | <i>Fructilactobacillus sanfranciscensis</i> | Laboratory storage |
| 76 | FS3  | <i>Fructilactobacillus sanfranciscensis</i> | Laboratory storage |
| 77 | FS4  | <i>Fructilactobacillus sanfranciscensis</i> | Laboratory storage |
| 78 | FS6  | <i>Fructilactobacillus sanfranciscensis</i> | Laboratory storage |
| 79 | P.p8 | <i>Pediococcus pentosaceus</i>              | Laboratory storage |
| 80 | LP25 | <i>Lactiplantibacillus plantarum</i>        | Laboratory storage |

## the maximum tolerated concentration test

### Methods

Determination of the maximum tolerated concentration in zebrafish

A total of 390 zebrafish at 3 days after fertilization were selected and divided into the following groups: normal control group, PP18 inactivated cell intervention group (K-PP18), LP1 inactivated cell intervention group (K-LP1), and LP25 inactivated cell intervention group (K-LP25). zebrafish in the normal control group were fed fish water normally, and the inactivated bacteria somatic cells were resuspended in fish water at final concentrations of  $10^9$  CFU/mL,  $10^8$  CFU/mL,  $10^7$  CFU/mL, and  $10^6$  CFU/mL, respectively. The fish water was added to the 6-well plate at volume of 3 mL per well, with 30 zebrafish per well. The fish water was changed daily for 3 days. After the treatment, the mortality of zebrafish was observed and recorded to determine the maximum tolerated concentration.

### Results

Maximum tolerance concentration selection

Larval zebrafish were exposed to various concentration gradients of postbiotics for 3 days after fertilization. The mortality of the zebrafish was observed to determine the maximum tolerated concentration of postbiotics. The results are presented in Table S2. PP18 and L.p1 inactivated cells were treated with  $10^8$  CFU/mL for three days, and the mortality rate of zebrafish was 0. The maximum tolerance concentration of zebrafish to PP18 and LP1 inactivated cells was  $10^8$  CFU/mL, while LP25 inactivated cells were treated with  $10^7$  CFU/mL, resulting in a 0% mortality rate for the zebrafish. The maximum tolerance concentration of LP25 inactivated somatic

cells for zebrafish was  $10^7$  CFU/mL.

**Table S2. Selection of the optimal concentration for metagenetic intervention**

| Group   | Concentration<br>(CFU/mL) | Total (tail) | Number of<br>deaths (tail) | Mortality rate<br>(%) |
|---------|---------------------------|--------------|----------------------------|-----------------------|
| Control | —                         | 30           | 0                          | 0                     |
| PP18    | $10^9$                    | 30           | 12                         | 40                    |
| PP18    | $10^8$                    | 30           | 0                          | 0                     |
| PP18    | $10^7$                    | 30           | 0                          | 0                     |
| PP18    | $10^6$                    | 30           | 0                          | 0                     |
| LP1     | $10^9$                    | 30           | 3                          | 10                    |
| LP1     | $10^8$                    | 30           | 0                          | 0                     |
| LP1     | $10^7$                    | 30           | 0                          | 0                     |
| LP1     | $10^6$                    | 30           | 0                          | 0                     |
| LP25    | $10^9$                    | 30           | 7                          | 23.3                  |
| LP25    | $10^8$                    | 30           | 7                          | 23.3                  |
| LP25    | $10^7$                    | 30           | 0                          | 0                     |
| LP25    | $10^6$                    | 30           | 0                          | 0                     |

Note: The yellow highlights indicate the concentration applied to zebrafish experiment.
